# Supplementary material for: Resistance is not Futile: It Shapes Insecticide Discovery
Source: PubMed Central journal article supplement (PMC4592624; doi:10.3390/insects5010227), 2014-01-23
Supplement: insects-05-00227-s001.pdf [file insects-05-00227-s001.pdf]

Hardy 2013, *Insects*  
**Table S1.** Classification of insecticides from IRAC.

|    | Group                                                                     | Subgroup | Chemical Class/Example AI                                                     |
|----|---------------------------------------------------------------------------|----------|-------------------------------------------------------------------------------|
| 1  | Acetylcholinesterase inhibitor                                            | A        | Carbamates                                                                    |
|    |                                                                           | B        | Organophosphates                                                              |
| 2  | GABA-gated chloride channel antagonists                                   | A        | Cyclodiene organochlorines                                                    |
|    |                                                                           | B        | Phenylpyrazoles (fiproles)                                                    |
| 3  | Sodium channel modulators                                                 | A        | Pyrethroids, pyrethrins                                                       |
|    |                                                                           | B        | DDT, methoxychlor                                                             |
| 4  | Nicotinic acetylcholine receptor agonists                                 | A        | Neonicotinoids                                                                |
|    |                                                                           | B        | Nicotine                                                                      |
|    |                                                                           | C        | Sulfoxaflor                                                                   |
| 5  | Nicotinic acetylcholine receptor allosteric activators                    |          | Spinosyns                                                                     |
| 6  | Chloride channel activators                                               |          | Avermectins, milbemycins                                                      |
| 7  | Juvenile hormone mimics                                                   | A        | Juvenile hormone analogs                                                      |
|    |                                                                           | B        | Fenoxycarb                                                                    |
|    |                                                                           | C        | Pyriproxyfen                                                                  |
| 8  | Miscellaneous nonspecific (multi-site) inhibitors                         | A        | Alkyl halides                                                                 |
|    |                                                                           | B        | Chloropicrin                                                                  |
|    |                                                                           | C        | Sulfuryl fluoride                                                             |
|    |                                                                           | D        | Borates                                                                       |
|    |                                                                           | E        | Tartar emetic                                                                 |
| 9  | Selective homopteran feeding blockers                                     | A        | Pymetrozine                                                                   |
|    |                                                                           | B        | Fonicamid                                                                     |
| 10 | Mite growth inhibitors                                                    | A        | Clofentezine                                                                  |
|    |                                                                           | B        | Etoazole                                                                      |
| 11 | Microbial disruptor of insect midgut membranes                            | A        | <i>Bacillus thuringiensis</i> (incl. insecticidal proteins)                   |
|    |                                                                           | B        | <i>Bacillus spaericus</i> (incl. insecticidal proteins)                       |
| 12 | Inhibitors of mitochondrial ATP synthase                                  | A        | Diafenthion                                                                   |
|    |                                                                           | B        | Organotin miticides                                                           |
|    |                                                                           | C        | Propargite                                                                    |
|    |                                                                           | D        | Tetradifon                                                                    |
| 13 | Uncouplers of oxidative phosphorylation via disruption of proton gradient | A        | Chlorfenapyr                                                                  |
|    |                                                                           | B        | Dinitro- <i>ortho</i> -cresol (DNOC)                                          |
|    |                                                                           | C        | Sulfuramid                                                                    |
| 14 | Nicotinic acetylcholine receptor channel blockers                         |          | Nereistoxin analogs                                                           |
| 15 | Inhibitors of chitin biosynthesis, type 0                                 |          | Benzoylureas                                                                  |
| 16 | Inhibitors of chitin biosynthesis, type 1                                 |          | Buprofezin                                                                    |
| 17 | Moulting disruptor, Diptera                                               |          | Cyromazine                                                                    |
| 18 | Ecdysone receptor agonists                                                |          | Diacylhydrazines                                                              |
| 19 | Octopaminergic receptor agonists                                          |          | Amitraz                                                                       |
| 20 | Mitochondrial Complex III electron transport inhibitors                   | A        | Hydramethylnon                                                                |
|    |                                                                           | B        | Acequinocyl                                                                   |
|    |                                                                           | C        | Fluacrypyrim                                                                  |
| 21 | Mitochondrial Complex I electron transport inhibitors                     | A        | Mitochondrial electron transport inhibitor (METI) acaricides and insecticides |
|    |                                                                           | B        | Rotenone                                                                      |
| 22 | Voltage-dependent sodium channel blockers                                 | A        | Indoxacarb                                                                    |
|    |                                                                           | B        | Metaflumizone                                                                 |
| 23 | Inhibitors of acetyl CoA carboxylase - Lipid synthesis, growth regulation |          | Tetronic and tetramic acid derivatives                                        |
| 24 | Mitochondrial Complex IV electron transport inhibitors                    | A        | Aluminum/Calcium/Zinc phosphide, phosphine                                    |
|    |                                                                           | B        | Cyanide                                                                       |
| 25 | Mitochondrial Complex II electron transport inhibitors                    |          | Pyrazole                                                                      |
| 28 | Ryanodine receptor modulators                                             |          | Diamides                                                                      |
| UN | Compounds of unknown or uncertain mode of action                          | A        | Azadirachtin                                                                  |
|    |                                                                           | B        | Bifenazate                                                                    |
|    |                                                                           | C        | Promopropylate                                                                |
|    |                                                                           | D        | Chinomethionat                                                                |
|    |                                                                           | E        | Cryolite                                                                      |
|    |                                                                           | F        | Dicofol                                                                       |
|    |                                                                           | G        | Pyridalyl                                                                     |
|    |                                                                           | H        | Pyriproxyfen                                                                  |
