# Supplementary material for: Resistance is not Futile: It Shapes Insecticide Discovery
Source: PubMed Central journal article supplement (PMC4592624; doi:10.3390/insects5010227), 2014-01-23
Supplement: insects-05-00227-s002.pdf [file insects-05-00227-s002.pdf]

**Table S2.** The number of invasive insect species in North America.

| Order      | Family         | Species | Order        | Family          | Species         |   |
|------------|----------------|---------|--------------|-----------------|-----------------|---|
| Blattodea  | Blattellidae   | 2       | Hymenoptera  | Agaonidae       | 2               |   |
|            | Blattidae      | 1       |              | Aphelinidae     | 1               |   |
| Coleoptera | Anobiidae      | 1       |              | Apidae          | 3               |   |
|            | Bostrichidae   | 1       |              | Chrysididae     | 1               |   |
|            | Brachyceridae  | 1       |              | Cynipidae       | 1               |   |
|            | Brentidae      | 1       |              | Diprionidae     | 2               |   |
|            | Buprestidae    | 4       |              | Formicidae      | 9               |   |
|            | Cerambycidae   | 35      |              | Megachilidae    | 1               |   |
|            | Chrysomelidae  | 15      |              | Pamphiliidae    | 1               |   |
|            | Coccinellidae  | 4       |              | Siricidae       | 6               |   |
|            | Cryptophagidae | 1       |              | Tenthredinidae  | 2               |   |
|            | Curculionidae  | 99      |              | Vespidae        | 4               |   |
|            | Dermeestidae   | 1       |              | Isoptera        | Kalotermitidae  | 3 |
|            | Elateridae     | 5       |              |                 | Rhinotermitidae | 1 |
|            | Nitidulidae    | 1       | Termitidae   |                 | 1               |   |
|            | Scarabaeidae   | 13      | Termopsidae  |                 | 2               |   |
|            | Tenebrionidae  | 1       | Lepidoptera  | Agonoxenidae    | 1               |   |
| Collembola | Sminthuridae   | 1       |              | Carposinidae    | 1               |   |
| Diptera    | Agromyzidae    | 3       |              | Choreutidae     | 1               |   |
|            | Cecidomyiidae  | 4       |              | Cossidae        | 2               |   |
|            | Culicidae      | 2       |              | Crambidae       | 9               |   |
|            | Drosophilidae  | 1       |              | Elachistidae    | 1               |   |
|            | Muscidae       | 1       |              | Erebidae        | 2               |   |
|            | Oestridae      | 1       |              | Galacticidae    | 1               |   |
|            | Sarcophagidae  | 1       |              | Gelechiidae     | 6               |   |
|            | Tephritidae    | 22      |              | Geometridae     | 3               |   |
|            | Tipulidae      | 3       |              | Gracillariidae  | 4               |   |
| Hemiptera  | Adelgidae      | 3       |              | Lasiocampidae   | 5               |   |
|            | Aleyrodidae    | 8       |              | Limacodidae     | 1               |   |
|            | Alydidae       | 1       |              | Lycaenidae      | 1               |   |
|            | Aphididae      | 6       |              | Lymantriidae    | 9               |   |
|            | Aradidae       | 1       |              | Lyonetiidae     | 1               |   |
|            | Blissidae      | 1       |              | Noctuidae       | 14              |   |
|            | Cicadellidae   | 6       |              | Nolidae         | 1               |   |
|            | Coccidae       | 10      |              | Notodontidae    | 2               |   |
|            | Coreidae       | 1       |              | Opostegidae     | 1               |   |
|            | Delphacidae    | 1       |              | Papilionidae    | 1               |   |
|            | Diaspididae    | 22      |              | Pieridae        | 2               |   |
|            | Eriococcidae   | 3       |              | Plutellidae     | 1               |   |
|            | Kerriidae      | 1       |              | Psychidae       | 1               |   |
|            | Lygaeidae      | 3       |              | Pyralidae       | 2               |   |
|            | Margarodidae   | 1       |              | Saturniidae     | 2               |   |
|            | Miridae        | 2       |              | Sesiidae        | 2               |   |
|            | Oxycarenidae   | 1       |              | Sphingidae      | 1               |   |
|            | Pentatomidae   | 4       |              | Tineidae        | 1               |   |
|            | Phylloxeridae  | 1       |              | Tortricidae     | 26              |   |
|            | Piesmatidae    | 1       |              | Yponomeutidae   | 5               |   |
|            | Plataspidae    | 1       | Odonata      | Libellulidae    | 4               |   |
|            | Pseudococcidae | 9       | Orthoptera   | Gryllotalpidae  | 2               |   |
|            | Psyllidae      | 2       |              | Tettigoniidae   | 1               |   |
|            | Pyrrhocoridae  | 1       | Thysanoptera | Phlaeothripidae | 1               |   |
|            | Scutelleridae  | 1       |              | Thripidae       | 9               |   |
|            |                |         |              | <b>Total</b>    | <b>483</b>      |   |
